# Supplementary material for: The Combined Effects of Ocean Acidification and Heavy Metals on Marine Organisms: A Meta-Analysis
Source: Frontiers journal article supplement (doi:10.3389/fmars.2021.801889), 2021-12-23
Supplement: Data_Sheet_1.docx [file Data_Sheet_1.docx]

**Supplementary Information**

**The combined effects of ocean acidification and heavy metals on marine organisms - A meta-analysis**

Peng Jin1, Jiale Zhang1, Jiaofeng Wan1, Sebastian Overmans2, Guang Gao3, Mengcheng Ye1, Xiaoying Dai1, Jingyuan Zhao1, Mengting Xiao1, Jianrong Xia1*

*1School of Environmental Science and Engineering,* *Guangzhou University, Guangzhou, 510006, China*

*2 King Abdullah University of Science and Technology (KAUST), Biological and Environmental Sciences and Engineering Division (BESE), Thuwal, 23955-6900, Saudi Arabia*

*3 State Key Laboratory of Marine Environmental Science & College of Ocean and Earth Sciences, Xiamen University, Xiamen 361005, China*

* Corresponding author: jrxia@gzhu.edu.cn

Address: Guangzhou Higher Education Mega Center, Wai Huan Xi Road 230, Guangzhou 510006, P. R. China.

**Table S4.** The effect of pH reductions on the effect size (Hedge's *d*) from continuous random-effect weighted meta-analysis. OA: ocean acidification, HM: heavy metals. *indicates *p* < 0.05.

|  | Taxa | df | slope | F ratio | *p*-value |
| --- | --- | --- | --- | --- | --- |
| OA | Coral | 27 | -1.639 | 0.1313 | 0.720 |
| Macroalgae | 116 | -10.025 | 8.533 | 0.004* |
| Microalgae | 68 | -0.216 | 0.003 | 0.957 |
| Mollusc | 285 | 0.717 | 4.562 | 0.034* |
|  |  |  |  |  |  |
| HM | Coral | 27 | -21.347 | 6.877 | 0.014* |
| Macroalgae | 116 | -16.864 | 10.221 | 0.002* |
| Microalgae | 68 | 4.870 | 0.261 | 0.611 |
| Mollusc | 285 | 0.995 | 4.476 | 0.035* |
|  |  |  |  |  |  |
| OA × HM | Coral | 27 | -1.436 | 0.038 | 0.848 |
| Macroalgae | 116 | -20.867 | 22.820 | <0.001* |
| Microalgae | 68 | 12.118 | 2.306 | 0.134 |
| Mollusc | 285 | 2.354 | 16.464 | <0.001* |

**Table S5.** The effect of heavy metal concentrations (µg L-1) on the effect size (Hedge's *d*) from continuous random-effect weighted meta-analysis. OA: ocean acidification, HM: heavy metals. *indicates *p* < 0.05.

|  | Heavy metals | df | slope | F ratio | *p*-value |
| --- | --- | --- | --- | --- | --- |
| OA | Cu | 119 | 0.007 | 2.624 | 0.108 |
| Cd | 139 | 0.0001 | 13.771 | 0.0003* |
| Ni | 8 | -0.004 | 0.097 | 0.765 |
| Zn | 22 | -0.0003 | 0.0009 | 0.977 |
|  |  |  |  |  |  |
| HM | Cu | 119 | -0.015 | 5.717 | 0.018* |
| Cd | 139 | -0.00006 | 1.734 | 0.190 |
| Ni | 8 | 0.012 | 0.831 | 0.392 |
| Zn | 22 | -0.006 | 0.065 | 0.802 |
|  |  |  |  |  |  |
| OA × HM | Cu | 119 | -0.0025 | 0.224 | 0.637 |
| Cd | 139 | -0.0001 | 5.120 | 0.025* |
| Ni | 8 | 0.0016 | 0.008 | 0.933 |
| Zn | 22 | -0.0037 | 0.019 | 0.893 |

**References used in meta-analysis**

Bielmyer-Fraser GK, Patel P, Capo T, et al (2018) Physiological responses of corals to ocean acidification and copper exposure. Marine Pollution Bulletin, 133(AUG): 781-790. doi:10.1016/j.marpolbul.2018.06.048

Biscéré T, Rodolfo-Metalpa R, Lorrain A, et al (2015) Responses of two scleractinian corals to cobalt pollution and ocean acidification. PLoS ONE, 10(4): e0122898. doi:10.1371/journal.pone.0122898

Cao RW, Liu YL, Wang Q, et al (2018) Seawater acidification aggravated cadmium toxicity in the oyster *Crassostrea gigas*: Metal bioaccumulation, subcellular distribution and multiple physiological responses. Science of the Total Environment, 642: 809-823. doi:10.1016/j.scitotenv.2018.06.126

Cao RW, Liu YL, Wang Q, et al (2018) The impact of ocean acidification and cadmium on the immune responses of Pacific oyster, *Crassostrea gigas*. Fish & Shellfish Immunology, 81: 456-462. doi:10.1016/j.fsi.2018.07.055

Cao RW, Zhang TY, Li X, et al (2019) Seawater acidification increases copper toxicity: a multi-biomarker approach with a key marine invertebrate, the pacific oyster *Crassostrea gigas*. Aquatic Toxicology, 210: 167-168. doi:10.1016/j.aquatox.2019.03.002

Cui WT, Cao L, Liu JH, et al (2020) Effects of seawater acidification and cadmium on the antioxidant defense of flounder *Paralichthys olivaceus* larvae. Science of The Total Environment, 718: 137234. doi:10.1016/j.scitotenv.2020.137234

Dong F, Wang P, Qian W, et al (2020) Mitigation effects of CO2-driven ocean acidification on Cd toxicity to the marine diatom *Skeletonema costatum*. Environmental Pollution, 259: 113850. doi:10.1016/j.envpol.2019.113850

Dong F, Zhu XS, Qian W, et al (2020) Combined effects of CO2-driven ocean acidification and Cd stress in the marine environment: Enhanced tolerance of *Phaeodactylum tricornutum* to Cd exposure. Marine Pollution Bulletin, 150: 110594. doi:10.1016/j.marpolbul.2019.110594

Duckworth CG, Picariello CR, Thomason RK, et al (2016) Responses of the sea anemone, *Exaiptasia pallida*, to ocean acidification conditions and zinc or nickel exposure. Aquatic Toxicology, 182: 120-128. doi:10.1016/j.aquatox.2016.11.014

Gao G, Liu YM, Li XS, et al (2017) Expected CO2-induced ocean acidification modulates copper toxicity in the green tide alga *Ulva prolifera*. Environmental and Experimental Botany, 135: 63-72. doi:10.1016/j.envexpbot.2016.12.007

Götze S, Matoo OB, Beniash E, et al (2014) Interactive effects of CO2 and trace metals on the proteasome activity and cellular stress response of marine bivalves *Crassostrea virginica* and *Mercenaria mercenaria*. Aquatic Toxicology, 149: 65-82. doi:10.1016/j.aquatox.2014.01.027

Ma J, Wang W, Liu X, et al (2019) Zinc toxicity alters the photosynthetic response of red alga *Pyropia yezoensis* to ocean acidification. Environmental Science and Pollution Research, 27(3): 3202-3212. doi:10.1007/s11356-019-06872-7

Moreira A, Figueira E, Soares AMVM, et al (2016) The effects of arsenic and seawater acidification on antioxidant and biomineralization responses in two closely related *Crassostrea* species. Science of the Total Environment, 545-546: 569-581. doi:10.1016/j.scitotenv.2015.12.029

Nardi A, Benedetti M, d’Errico G, et al (2018) Effects of ocean warming and acidification on accumulation and cellular responsiveness to cadmium in mussels *Mytilus galloprovincialis*: importance of the seasonal status. Aquatic Toxicology, 204: 171-179. doi:10.1016/j.aquatox.2018.09.009

Nardi A, Benedetti M, Fattorini D, et al (2018) Oxidative and interactive challenge of cadmium and ocean acidification on the smooth scallop *Flexopecten glaber*. Aquatic Toxicology, 196: 53-60. doi:10.1016/j.aquatox.2018.01.008

Nielson C, Hird C, Lewis C (2019) Ocean acidification buffers the physiological responses of the king ragworm *Alitta virens* to the common pollutant copper. Aquatic Toxicology, 212: 120-127. doi:10.1016/j.aquatox.2019.05.003

Zhang XS, Xu D, Huang SJ, et al (2020) The effect of elevated pCO2 on cadmium resistance of a globally important diatom. Journal of Hazardous Materials, 396: 122749. doi:10.1016/j.jhazmat.2020.122749
